# Supplementary material for: Sequencing, assembly, annotation, and gene expression: novel insights into browning-resistant Luffa cylindrica
Source: PeerJ journal article supplement (doi:10.7717/peerj.9661), 2020-08-10
Supplement: Supplemental_Information_S1.pdf [file Supplemental_Information_S1.pdf]

## Supplemental Information S1:

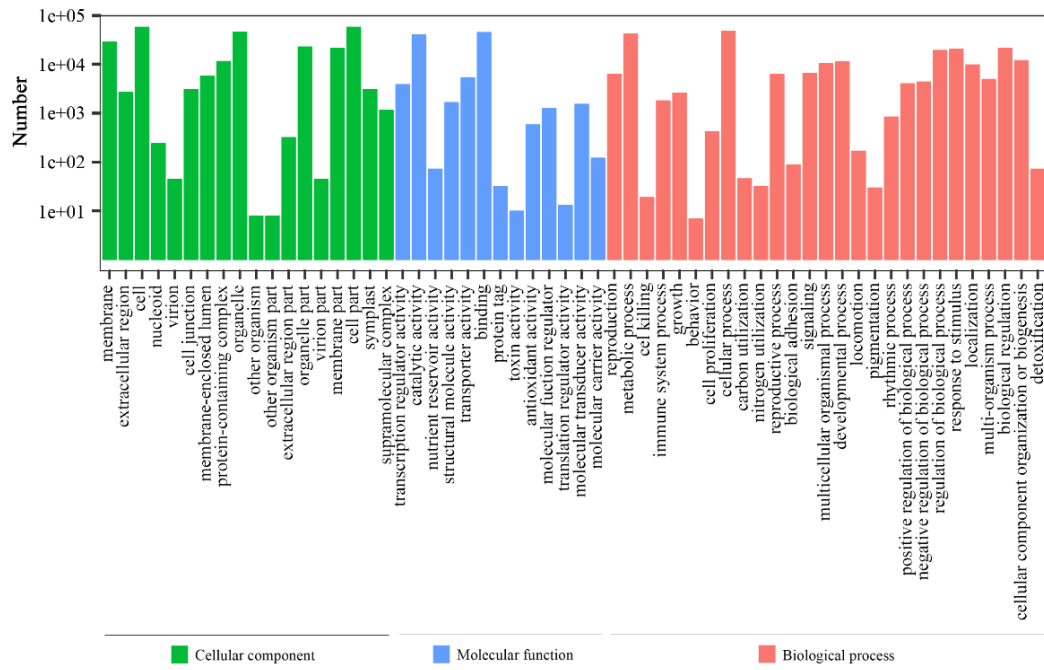

Figure S1 GO classification of the *Luffa* unigene library

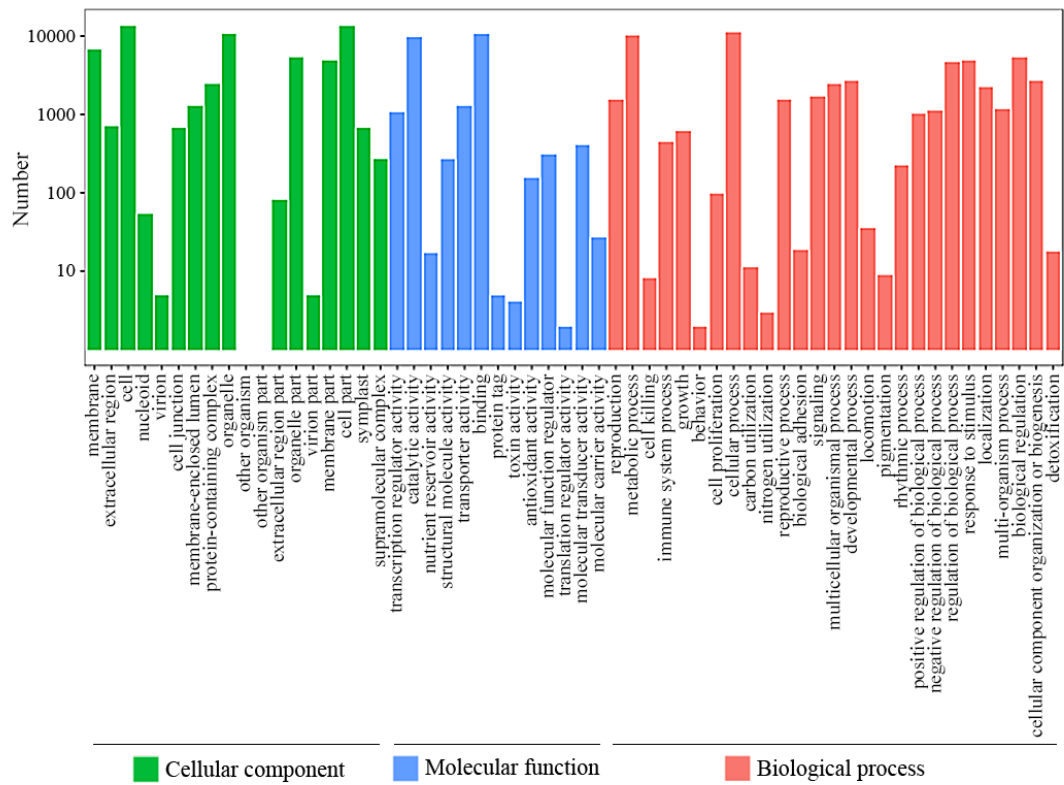

**FigureS2** GO classification of the DEGs identified in the unigene libraries between two

*Luffa* cultivars.

KEGG Classification

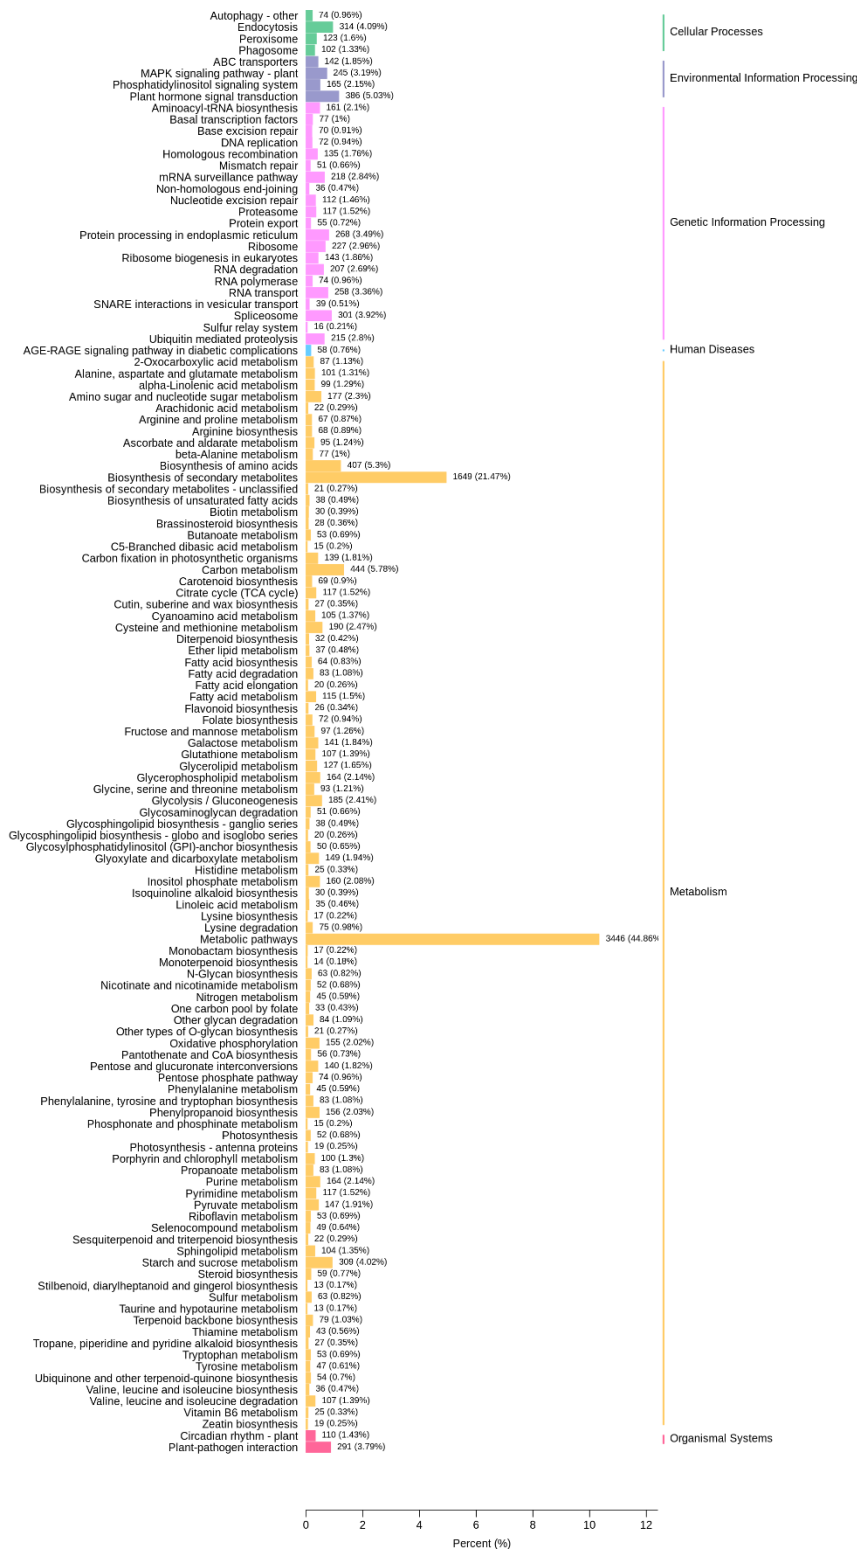

Figure S3 KEGG classification of the DEGs identified in the unigene libraries between two *Luffa* cultivars.

**Table S3** Comparison of unigenes identified in transcriptome during browning of ‘Fusi-3’ fruits and transcriptome of two *Luffa* cultivars ‘2D-2’ and ‘35D-7’.

| ‘Fusi-3’        |                  | ‘2D-2’ and ‘35D-3’  |                  |                 | Annotation                  |
|-----------------|------------------|---------------------|------------------|-----------------|-----------------------------|
| Unigene ID      | Expression trend | Unigene ID          | Expression trend | Log2fold change |                             |
| Unigene 0043875 | up               | Cluster-21832.13892 | up               | 7.15            | polyphenol oxidase          |
| Unigene0050171  | up               | none                | none             | none            | polyphenol oxidase          |
| Unigene0015096  | down             | Cluster-21832.13892 | up               | 7.15            | polyphenol oxidase          |
| Unigene0044748  | up               | Cluster-21832.39888 | -                | -               | phenylalanine ammonia-lyase |
| Unigene0024978  | up               | Cluster-47379.0     | up               | 2.16            | phenylalanine ammonia-lyase |
| Unigene0011770  | up               | Cluster-21832.19847 | up               | 2.27            | peroxidase                  |
| Unigene 0036262 | up               | Cluster-21832.36955 | up               | 2.72            | catalase                    |
| Unigene0033876  | down             | Cluster-21832.30636 | up               | 2.21            | catalase                    |
| Unigene 0021782 | up               | Cluster-21832.29146 | -                | -               | superoxide                  |
| Unigene0008835  | down             | Cluster-45332.0     | -                | -               | superoxide                  |
| Unigene0015506  | down             | Cluster-21832.7745  | up               | 9.46            | superoxide                  |

‘Fusi-3’ represents the transcript analysis during the browning of ‘Fusi-3’ fruits. ‘2D-2’ and ‘35D-7’ represents the transcript analysis of browning-resistant *Luffa* cultivar ‘2D-2’ and browning-prone *Luffa* cultivar ‘35D-7’. ‘None’ indicates no matching to the sequence. ‘-’ indicates that no significant difference was found in gene expression. Green and red color represents the same and opposite expression trend, respectively.

**Table S4** Information of WRKY transcription factors identified in the transcriptomes of *Luffa* '2D-2' and '35D-7'.

| Unigene No.         | Expression     |           | Domain |                         | Accession No.            |
|---------------------|----------------|-----------|--------|-------------------------|--------------------------|
|                     | log2FoldChange | Regulated | Number | Description             |                          |
| Cluster-18244.0     | 12.4292        | up        | 2      |                         | pfam03106                |
| Cluster-10926.1     | 10.0614        | up        | 2      |                         | pfam03106                |
| Cluster-21832.2248  | 3.58428        | up        | 1      |                         | smart00774               |
| Cluster-21832.38074 | 2.78687        | up        | 1      |                         | smart00774               |
| Cluster-21832.39105 | 2.34574        | up        | 2      |                         | pfam03106                |
| Cluster-21832.6008  | 2.27242        | up        | 2      |                         | pfam03106,<br>smart00774 |
| Cluster-21832.26783 | 2.06106        | up        | 1      |                         | smart 00774              |
| Cluster-18244.1     | 1.99927        | up        | 1      | WRKY DNA-binding domain | pfam03106                |
| Cluster-10926.2     | 1.79678        | up        | 2      |                         | pfam03106                |
| Cluster-21832.19413 | -1.7055        | down      | 2      |                         | pfam03106                |
| Cluster-21832.40922 | -2.4811        | down      | 2      |                         | pfam03106                |
| Cluster-21832.22382 | -2.7626        | down      | 2      |                         | pfam03106                |
| Cluster-21832.19423 | -9.7218        | down      | 2      |                         | pfam03106                |
| Cluster-21832.14119 | -9.8482        | down      | 2      |                         | pfam03106                |
| Cluster-21832.18531 | -9.8809        | down      | 2      |                         | pfam03106                |
| Cluster-21832.40775 | -9.9233        | down      | 2      |                         | pfam03106                |
| Cluster-18244.4     | -12.376        | down      | 2      |                         | pfam03106                |
